# Supplementary material for: Prognostic Value of the LATITUDE and CHAARTED Risk Criteria for Predicting the Survival of Men with Bone Metastatic Hormone‐Naïve Prostate Cancer Treated with Combined Androgen Blockade Therapy: Real‐World Data from a Japanese Multi‐Institutional Study
Source: Hindawi journal article supplement (doi:10.1155/2020/7804932), 2020-01-01
Supplement: f1 [file 7804932.f1.pdf]

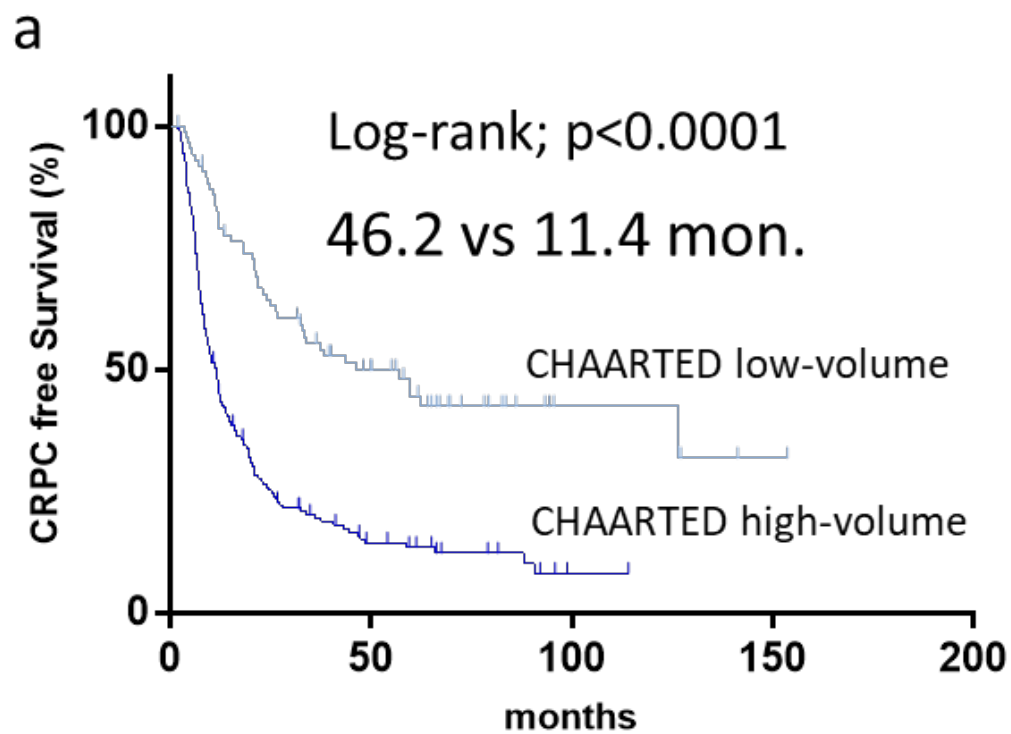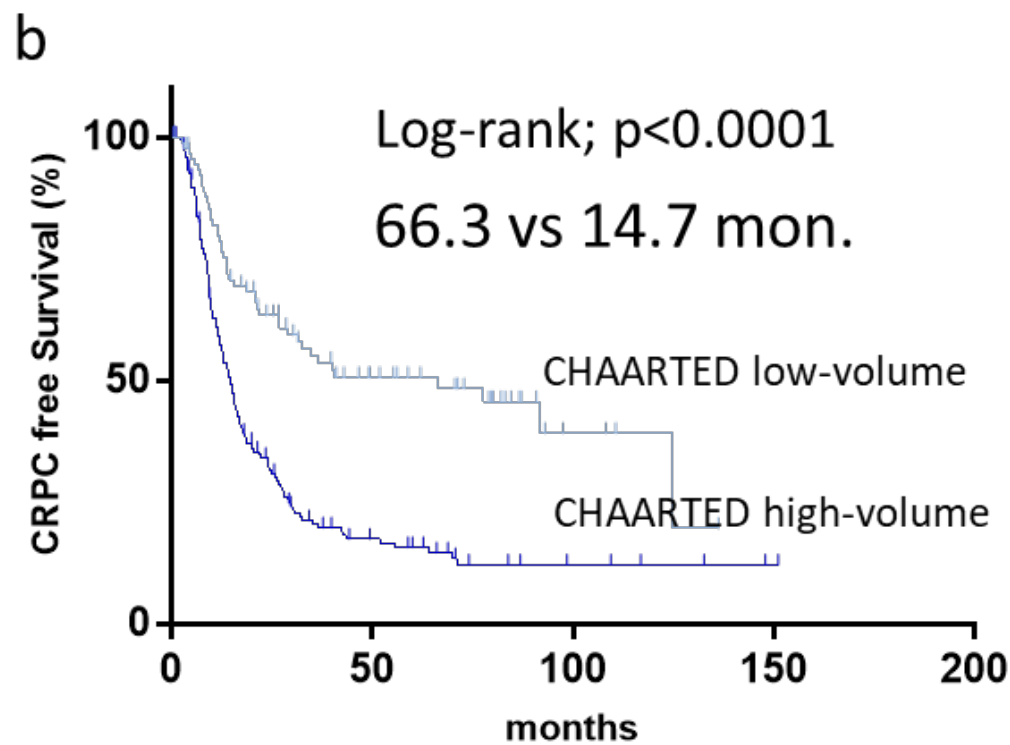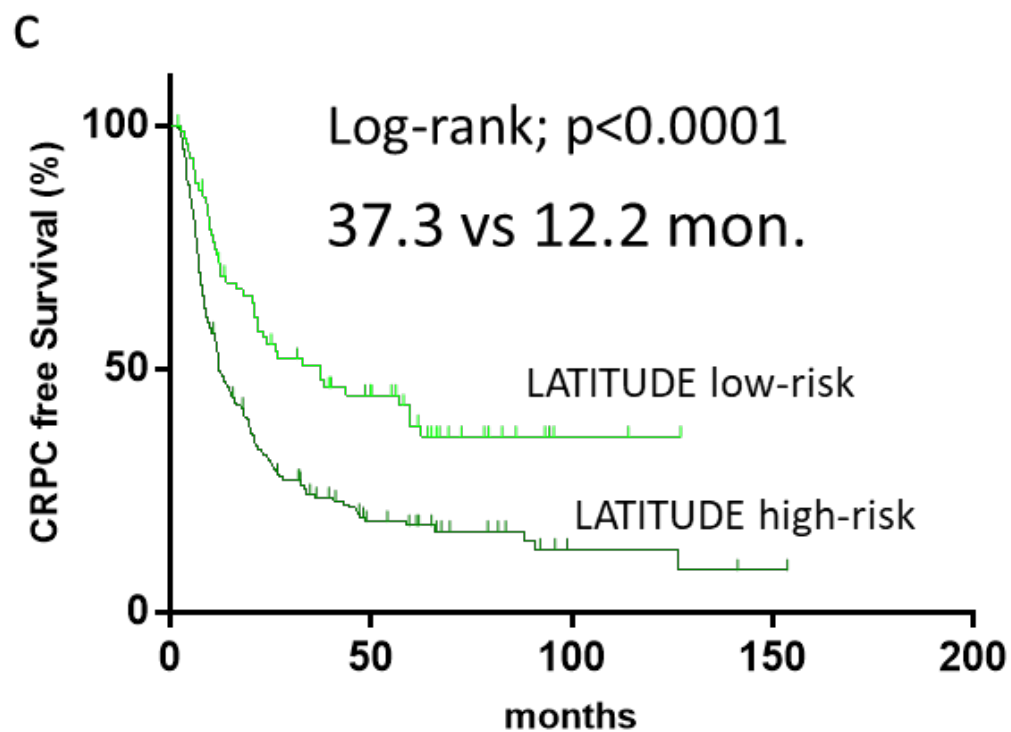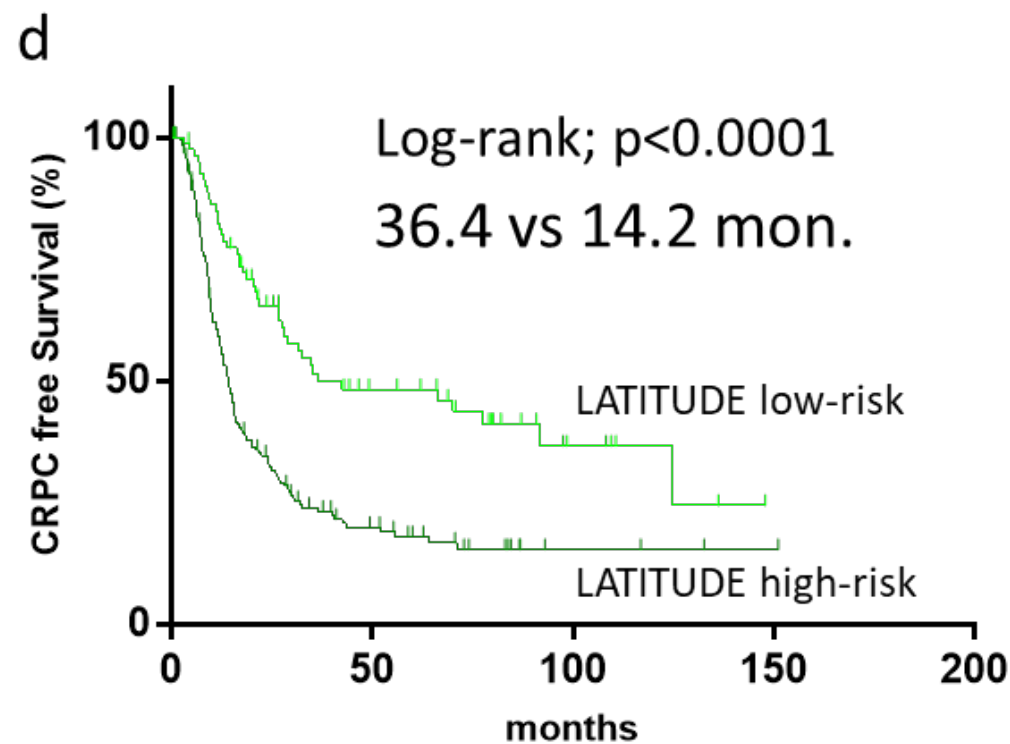

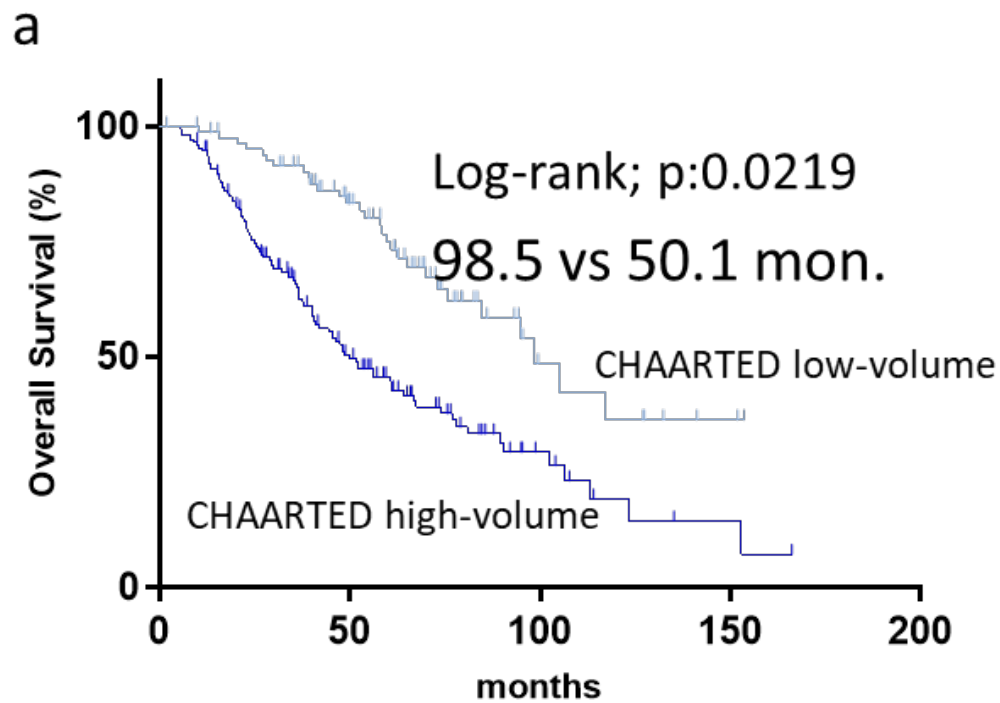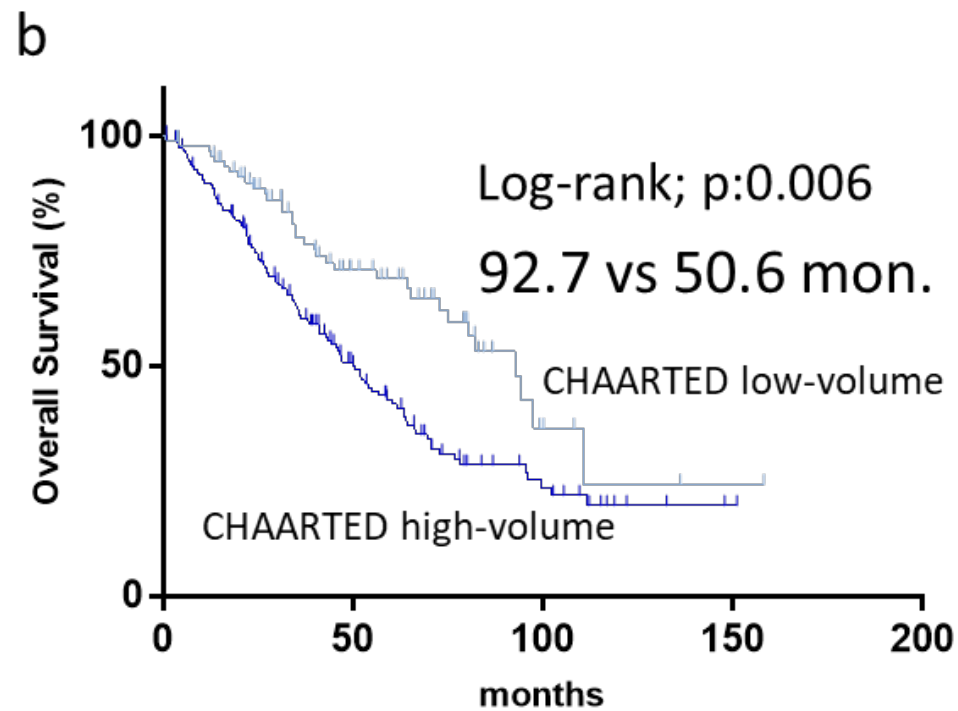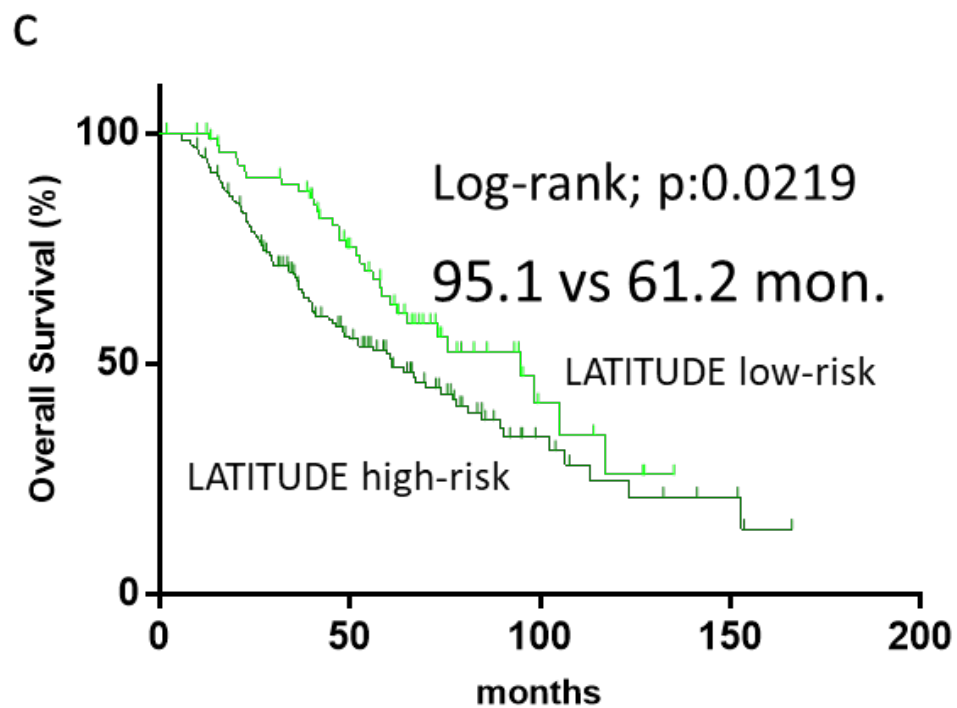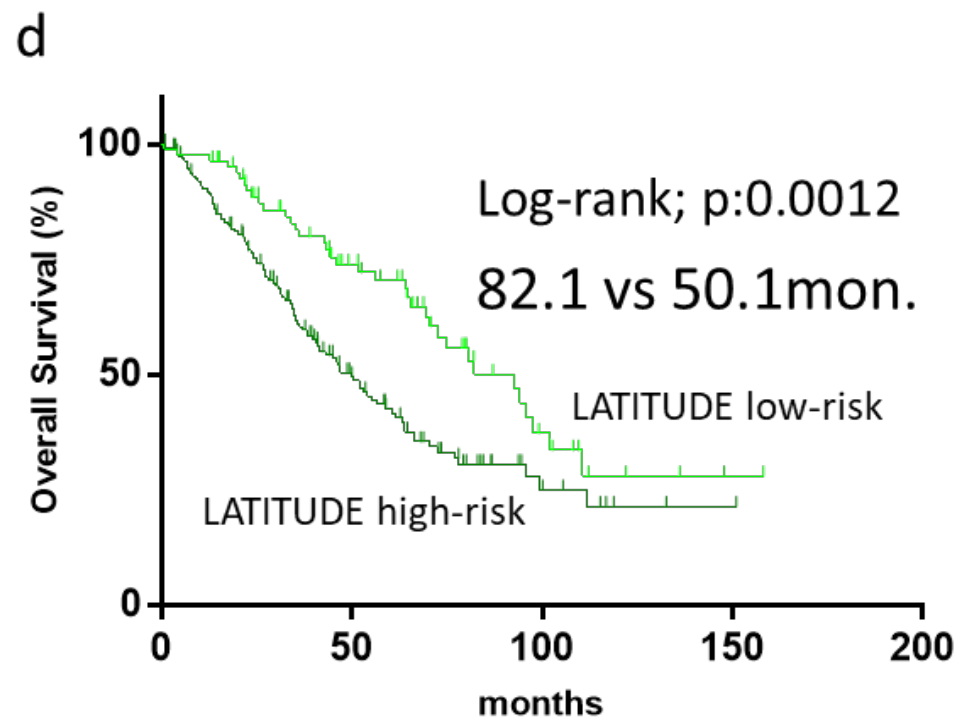

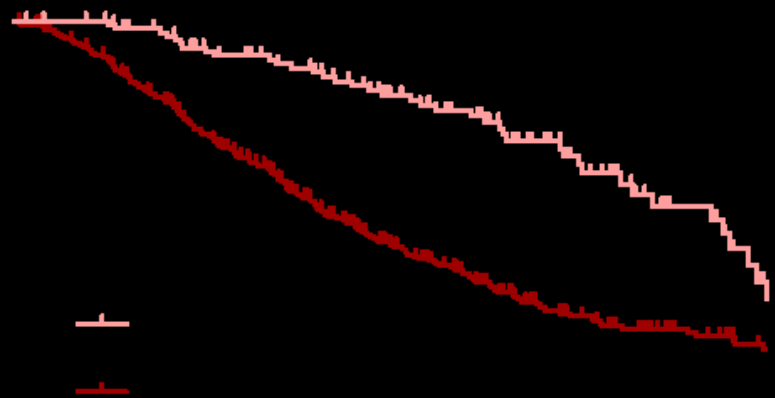

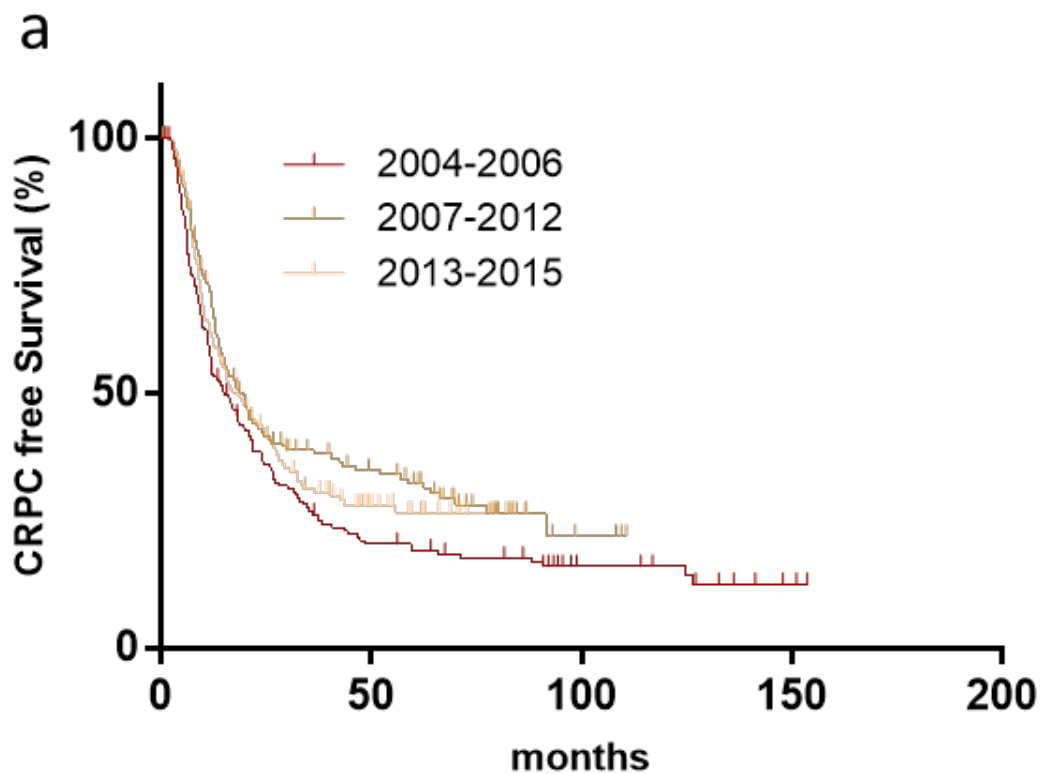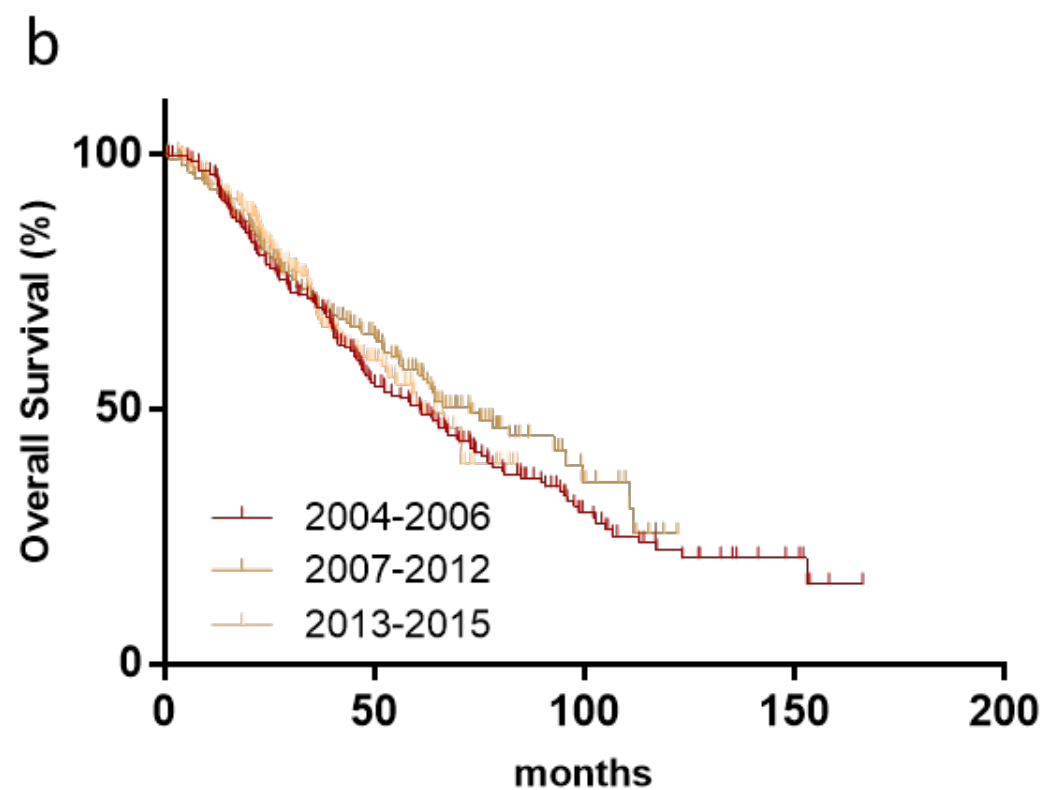

Supplementary Table 1

| CHAARTED High Volume                  | LATITUDE High Risk                    |
|---------------------------------------|---------------------------------------|
| 1. Visceral metastasis                | 1. Visceral metastasis*               |
| or                                    | 2. Bone metastasis ( $\geq 3$ sites)* |
| 2. Bone metastasis ( $\geq 4$ sites)* | 3. Gleason Score ( $\geq 8$ )*        |
| *At least one spine or extra pelvic   | *Two or more                          |
